# Supplementary material
Source: PubMed Central journal article supplement (PMC4037249)
Supplement: NIHMS425124-supplement-1.pdf [file NIHMS425124-supplement-1.pdf]

## Supplementary Material

### Fig. S1A No Calcium and Phosphates (MS reflector mode)

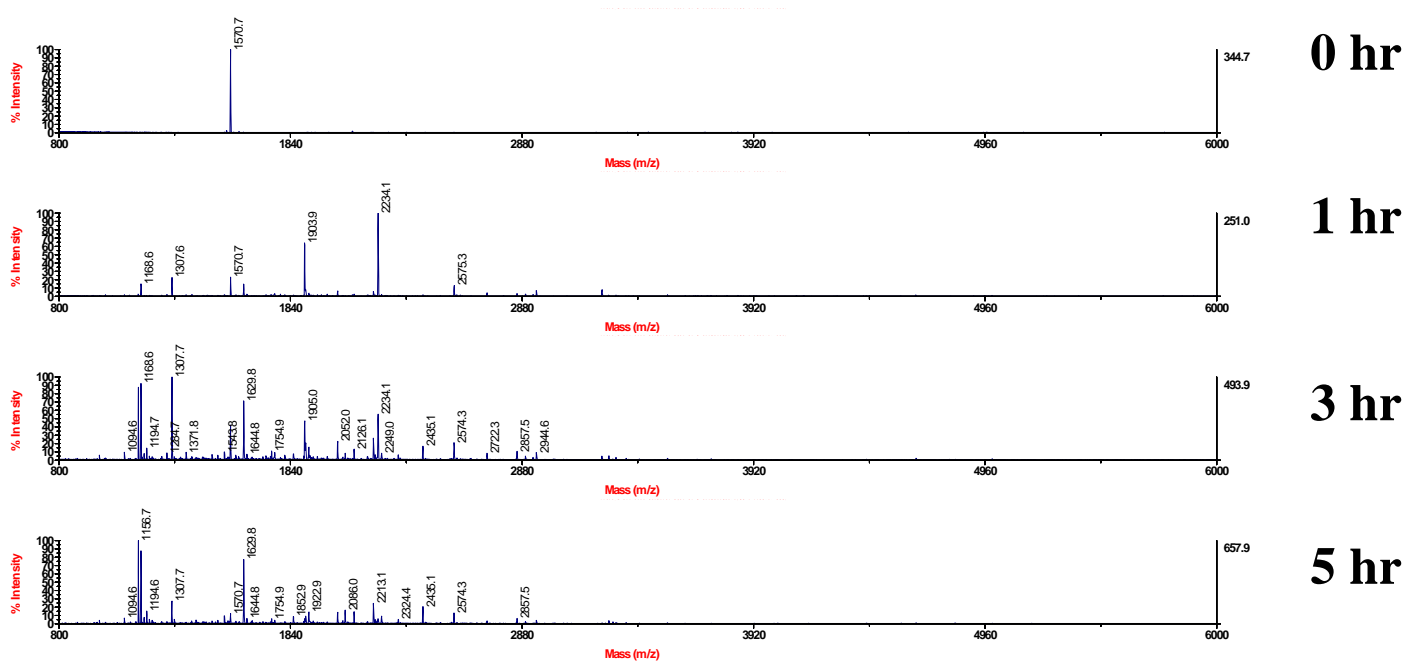

### Fig. S1B. Low Calcium and phosphates PO<sub>4</sub>, (MS reflector mode)

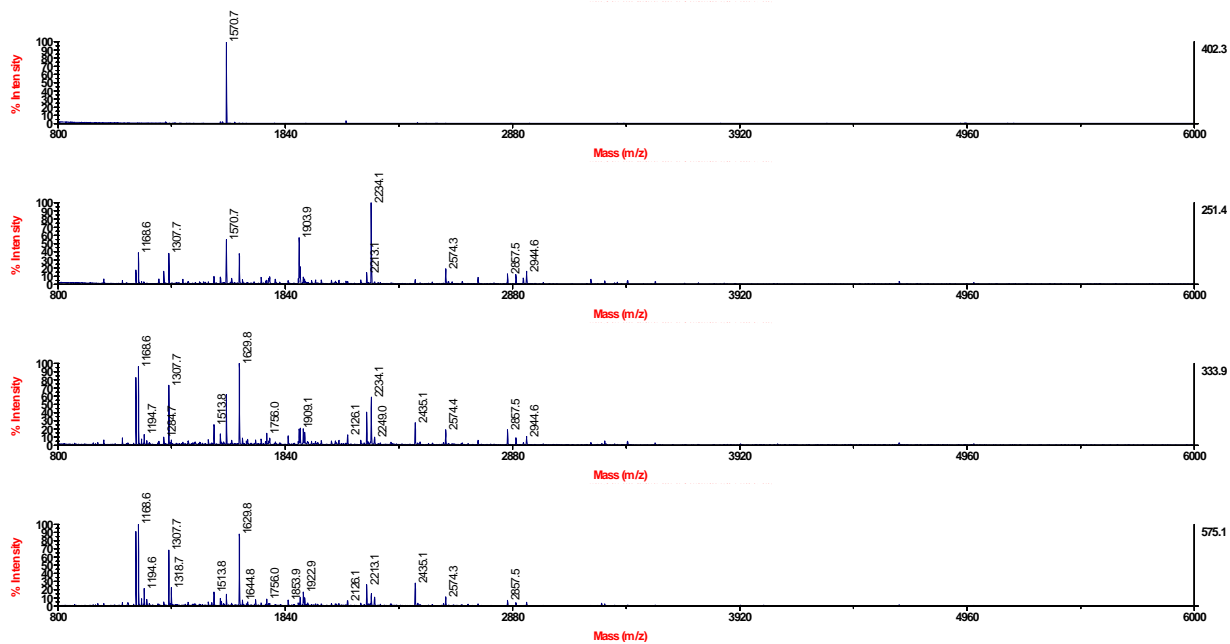

**Fig. S1C. High Calcium and phosphates, MS reflector mode**

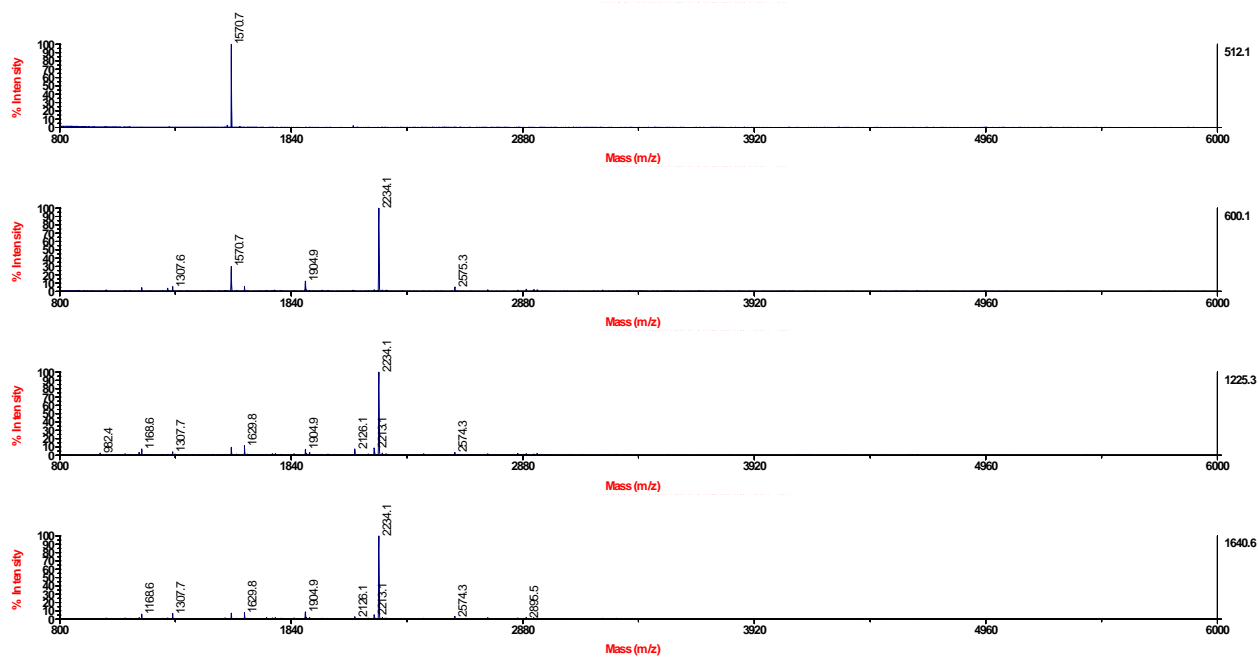

**Fig. S1D High Calcium, MS reflector mode**

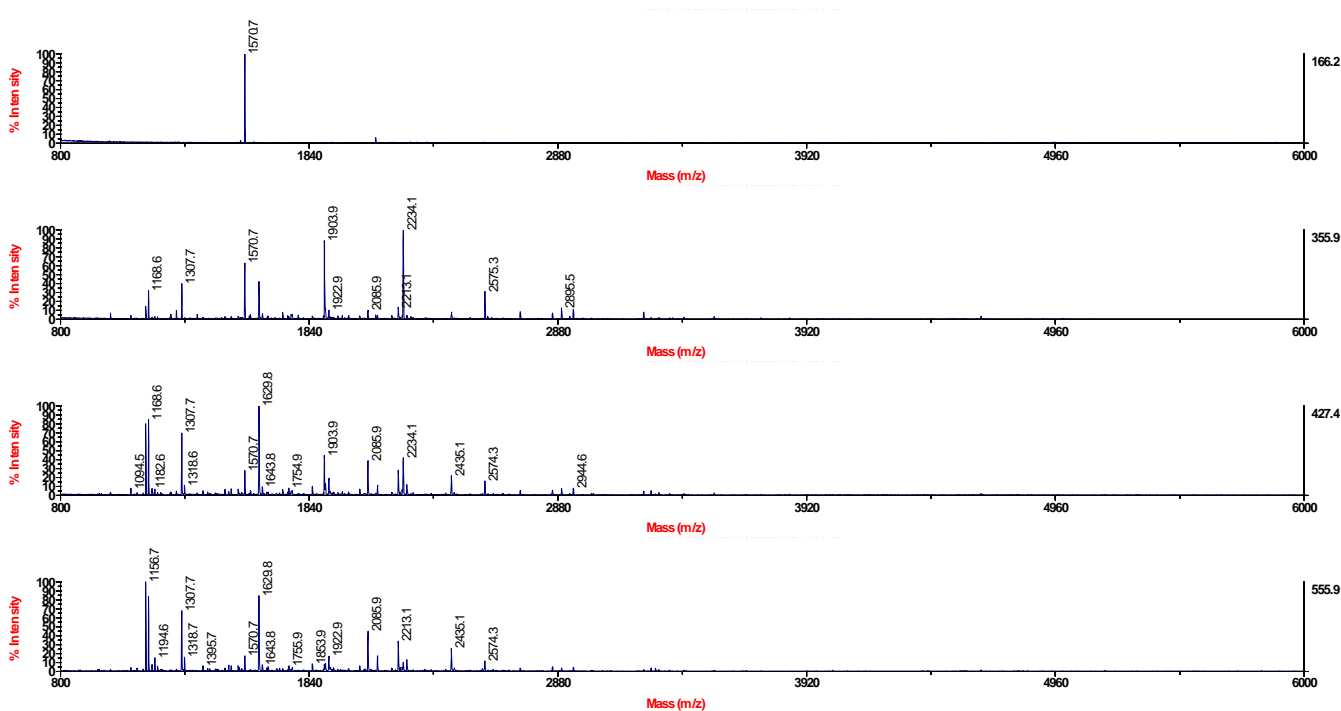

Fig. S1E. High phosphates, MS reflector mode

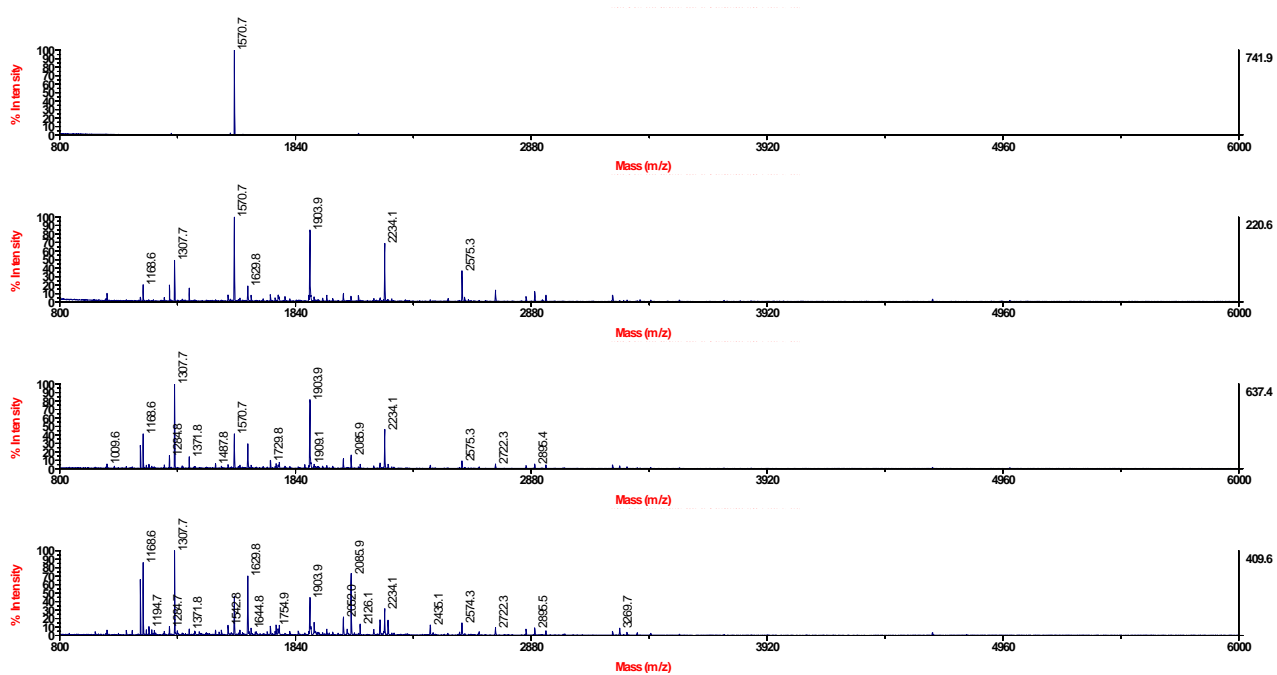

**Fig. S1F No Calcium and Phosphates MS linear mode**

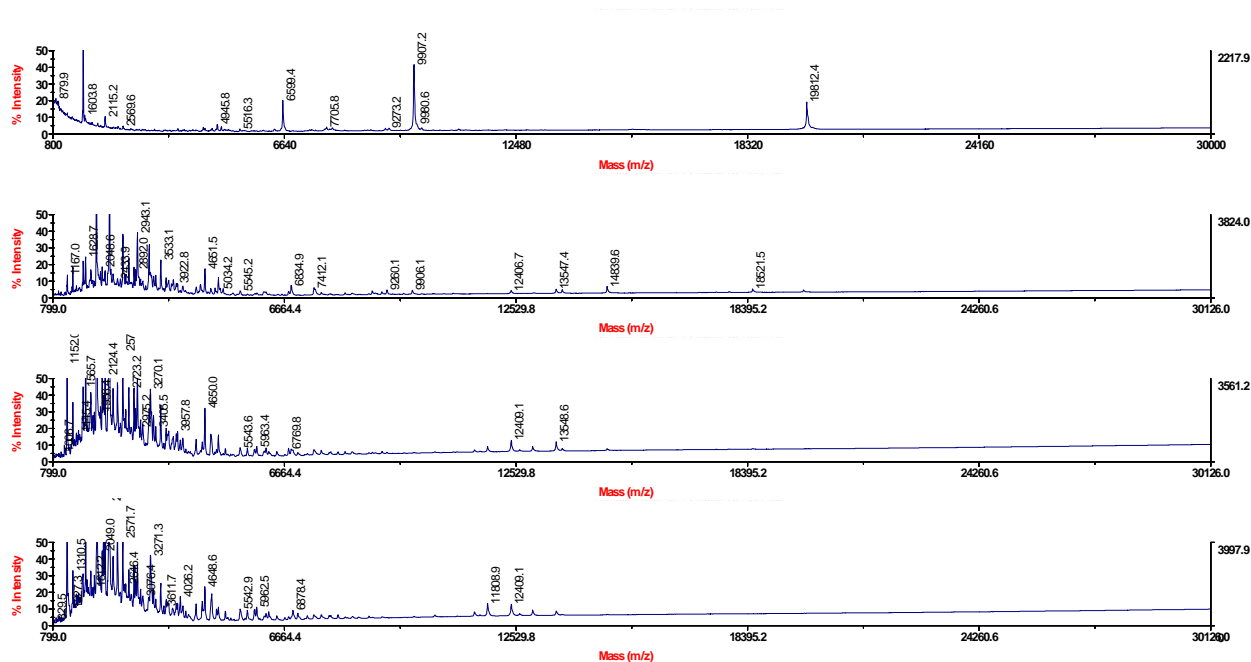

**Fig. S1G. Low Calcium and phosphates PO<sub>4</sub>, MS linear mode**

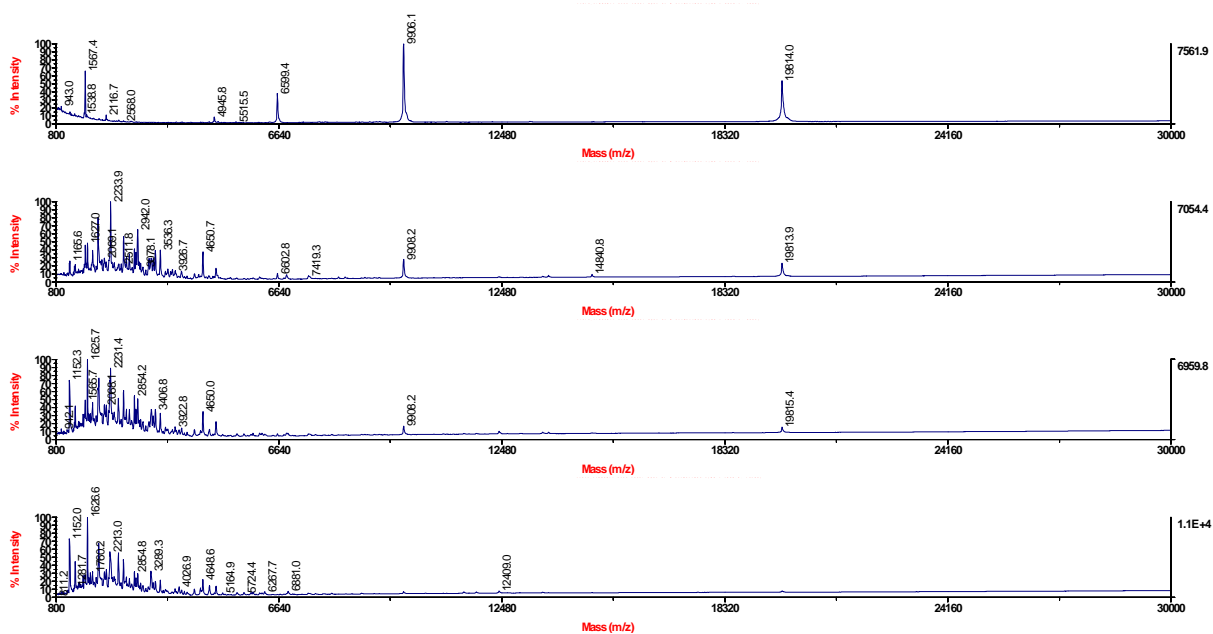

\* Note that y-axis in Fig. S1F is shown up to 50% (not 100%), which gives better view of the low abundance peaks.

**Fig. S1H. High Calcium and phosphates,**

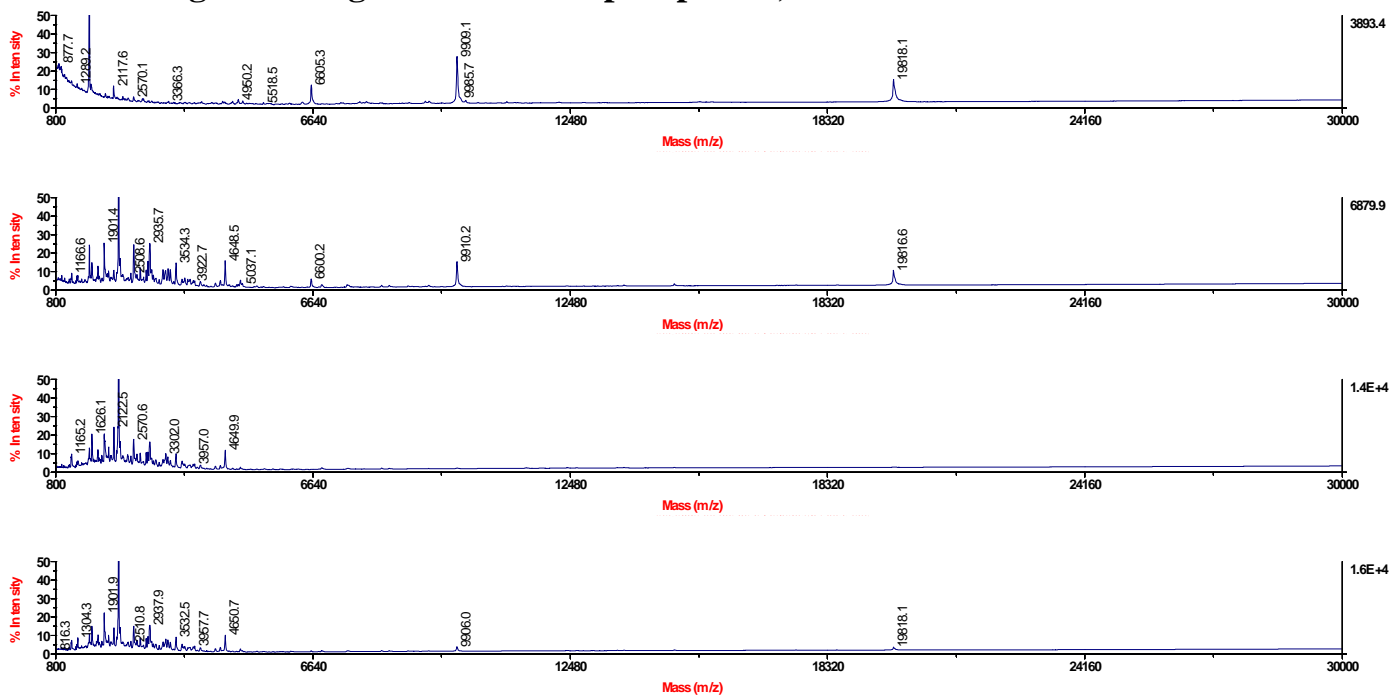

**Fig. S1I High Calcium , MS linear mode**

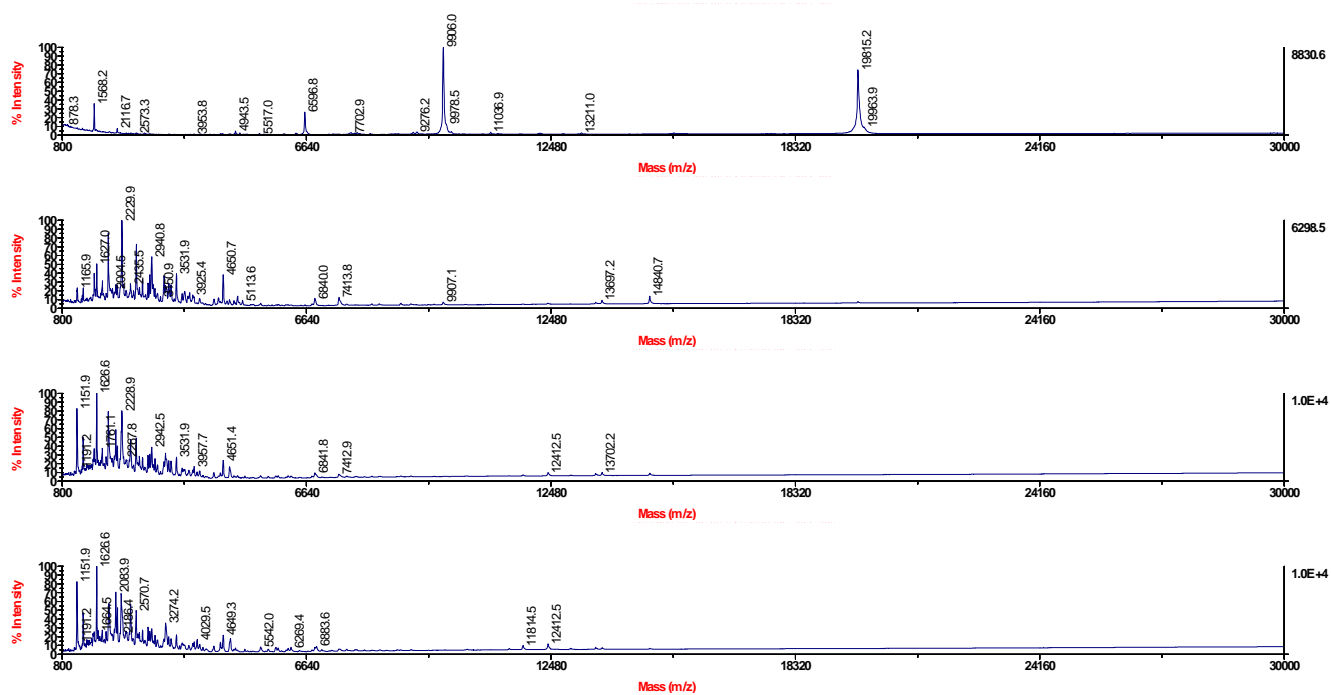

**Fig. S1J. High phosphates, MS linear mode**

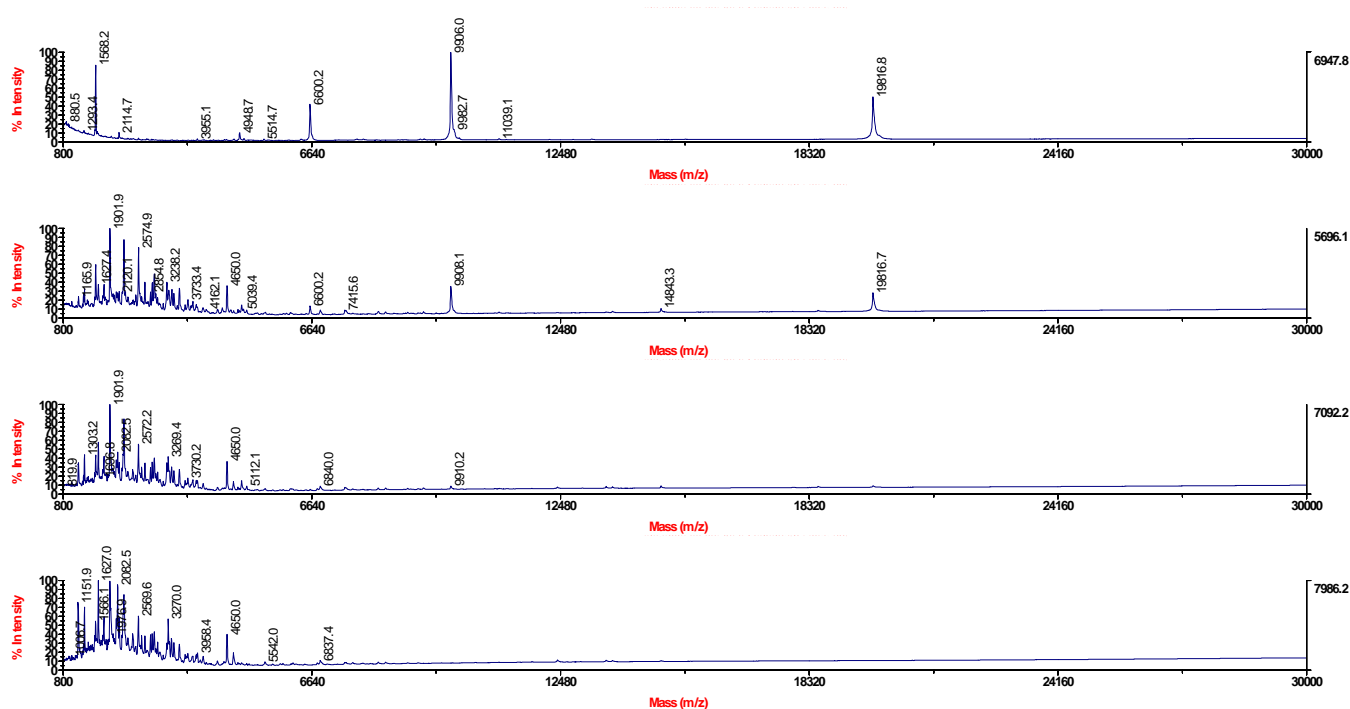

Fig. S1. Mass spectra of proteolysed amelogenin by MMP-20. (A-E) Reflector mode, (F-J) Linear Mode. Amelogenin (50.5  $\mu$ M) were incubated with 0.16  $\mu$ M of MMP-20 at 37  $^{\circ}$ C in a reaction buffer consists of 10 mM Tris buffer, 50 mM KCl, 1  $\mu$ M ZnCl<sub>2</sub>, 60  $\mu$ M CaCl<sub>2</sub> at pH 7.4 with following composition of mineral ions– (A,F) No Calcium and Phosphates– no extra CaCl<sub>2</sub> or KH<sub>2</sub>PO<sub>4</sub>; (B, G) Low Calcium and Phosphates– 3.34 mM CaCl<sub>2</sub> and 2.29 mM KH<sub>2</sub>PO<sub>4</sub>; (C, H) High Calcium and Phosphates– 33.4 mM CaCl<sub>2</sub> and 22.9 mM KH<sub>2</sub>PO<sub>4</sub>; (D, I) High Calcium– 33.4 mM CaCl<sub>2</sub>; (E) High Phosphates– 22.9 mM KH<sub>2</sub>PO<sub>4</sub>. Each Figure has four panels which stand for amelogenin digests collected at 0, 1, 3, 5 h. The peak at m/z 1570.7 Da in all spectra corresponds to [Glu<sup>1</sup>]-fibronopeptide B (m/z = 1570.68 Da), which was spiked in MALDI matrix for internal mass calibration.

| Conditions   | Protein score     | Amelogenin peptides identified | Modifications        | Conf. |    |
|--------------|-------------------|--------------------------------|----------------------|-------|----|
| No calcium   | 24                | DLTLEAWPSTDKTKREEVD            |                      | 99    |    |
| No phosphate |                   | LEAWPSTDKTKREEVD               |                      | 99    |    |
| 1 hour       |                   | LHHQIIPVLS                     |                      | 99    |    |
|              |                   | LLEAWPSTDKTKREEVD              |                      | 99    |    |
|              |                   | MLPDLTLEAWPSTDKTKREEVD         |                      | 99    |    |
|              |                   | MQPLPPMLPDLTLEAWPSTDKTKREEVD   |                      | 99    |    |
|              |                   | PLPPHPGHPGY                    |                      | 99    |    |
|              |                   | PLPPHPGHPGYINF                 |                      | 99    |    |
|              |                   | PLPPHPGHPGYINFS                |                      | 99    |    |
|              |                   | PLPPHPGHPGYINFSYE              |                      | 99    |    |
|              |                   | PLPPHPGHPGYINFSYEVLTPLK        |                      | 99    |    |
|              |                   | WYQSIRPPYPSYGYEPMGGW           |                      | 99    |    |
| No calcium   |                   | 14                             | DLTLEAWPSTDKTKREEVD  |       | 99 |
| No phosphate |                   |                                | LEAWPSTDKTKREEVD     |       | 99 |
| 3 hour       | LHHQIIPVLS        |                                |                      | 99    |    |
|              | PLPPHPGHPGY       |                                |                      | 99    |    |
|              | PLPPHPGHPGYINF    |                                |                      | 99    |    |
|              | PLPPHPGHPGYINFS   |                                |                      | 99    |    |
|              | PLPPHPGHPGYINFSYE |                                | 99                   |       |    |
| No calcium   | 52.42             | DLTLEAWPSTDKTKREEVD            |                      | 99    |    |
| No phosphate |                   | HHQPNLPPAQ                     |                      | 99    |    |
| 5 hour       |                   | HHQPNLPPAQQP                   |                      | 99    |    |
|              |                   | HHQPNLPPAQQPYPQP               |                      | 99    |    |
|              |                   | INFSYEVLTPLK                   |                      | 99    |    |
|              |                   | IQHHQPNLPPAQQP                 |                      | 99    |    |
|              |                   | IQHHQPNLPPAQQPYPQP             |                      | 99    |    |
|              |                   | LEAWPSTDKTKREEVD               | Oxidation(W)@4       | 99    |    |
|              |                   | LHHQIIPVLS                     |                      | 99    |    |
|              |                   | LHHQIIPVLSQ                    |                      | 99    |    |
|              |                   | MPLPPHPGHPGY                   |                      | 99    |    |
|              |                   | PLPPHPGHPGY                    |                      | 99    |    |
|              |                   | PLPPHPGHPGYIN                  |                      | 99    |    |
|              |                   | PLPPHPGHPGYINF                 |                      | 99    |    |
|              |                   | PLPPHPGHPGYINFS                |                      | 99    |    |
|              |                   | PLPPHPGHPGYINFSYE              |                      | 99    |    |
|              |                   | PLPPHPGHPGYINFSYEVLTPLK        |                      | 99    |    |
|              |                   | QSIRPPYPSYGYEPMGGW             | Gln->pyro-Glu@N-term | 99    |    |
|              |                   | SYGYEPMGGW                     |                      | 99    |    |
|              |                   | VQPQPHQPMQPPVHP                |                      | 99    |    |
|              |                   | WYQSIRPPYP                     |                      | 99    |    |
|              |                   | WYQSIRPPYPSYGYEPMGGW           |                      | 99    |    |
|              |                   | YEVLTPLK                       |                      | 99    |    |
|              |                   | YQSIRPPYP                      |                      | 99    |    |
|              |                   | YQSIRPPYPSYGYEPMGGW            |                      | 99    |    |
|              |                   | QQHPPTHTLQP                    |                      | 99    |    |
|              |                   | PPMLPDLT                       |                      | 93.1  |    |

## Sequence coverage

MGTWILFACLLGAAFAM**PLPPHPGHPGYINFSYEVLTPLK**WYQSIRPPYPSYGYEPMGGW**LHHQIIPVLS**QQHPPTHTLQPHHHIPVVPAAQPVIPQQPMMPVPGQHSMTPIQHHQPNLPPAQQPYPQPQPHQPMQPPVHPMQPLPPQPPLPPMFP**MQPLPDLTLEAWPSTDKTKREEVD**

MGTWILFACLLGAAFAM**PLPPHPGHPGYINFSYEVLTPLK**WYQSIRPPYPSYGYEPMGGW**LHHQIIPVLS**QQHPPTHTLQPHHHIPVVPAAQPVIPQQPMMPVPGQHSMTPIQHHQPNLPPAQQPYPQPQPHQPMQPPVHPMQPLPPQPPLPPMFP**MQPLPDLTLEAWPSTDKTKREEVD**

MGTWILFACLLGAAFAM**PLPPHPGHPGYINFSYEVLTPLK**WYQSIRPPYPSYGYEPMGGW**LHHQIIPVLS**QQHPPTHTLQPHHHIPVVPAAQPVIPQQPMMPVPGQHSMTPIQHHQPNLPPAQQPYPQPQPHQPMQPPVHPMQPLPPQPPLPPMFP**MQPLPDLTLEAWPSTDKTKREEVD**

Table S1. Amelogenin peptides identified from “No Calcium and No Phosphate” samples. All peptides identified with Conf<99 have been manually verified by inspecting their MS/MS spectra. In sequence coverage pictures, the sequences in green are associated with high confident (Conf.=99) peptides identified, while those in yellow or red are associated with low confident peptides identified (not shown in table).

| Conditions    | Protein score | Amelogenin peptides identified | Modifications | Conf. |
|---------------|---------------|--------------------------------|---------------|-------|
| Low calcium   | 10            | DLTLEAWPSTDKTKREEVD            |               | 99    |
| Low phosphate |               | LEAWPSTDKTKREEVD               |               | 99    |
| 1 hour        |               | LHHQIIPVLS                     |               | 99    |
|               |               | PLPPHPGHPGY                    |               | 99    |
|               |               | PLPPHPGHPGYINFS                |               | 99    |
| Low calcium   | 22.25         | DLTLEAWPSTDKTKREEVD            |               | 99    |
| Low phosphate |               | LEAWPSTDKTKREEVD               |               | 99    |
| 3 hour        |               | LHHQIIPVLS                     |               | 99    |
|               |               | PLPPHPGHPGY                    |               | 99    |
|               |               | PLPPHPGHPGYIN                  |               | 99    |
|               |               | PLPPHPGHPGYINF                 |               | 99    |
|               |               | PLPPHPGHPGYINFS                |               | 99    |
|               |               | PLPPHPGHPGYINFSYE              |               | 99    |
|               |               | WYQSIRPPYP                     |               | 99    |
|               |               | YEVLTPLK                       |               | 99    |
|               |               | YQSIRPPYP                      |               | 99    |
|               |               | LHHQIIP                        |               | 67.2  |
| Low calcium   | 30.43         | DLTLEAWPSTDKTKREEVD            |               | 99    |
| Low phosphate |               | HHQPNLPPPAQQP                  |               | 99    |
| 5 hour        |               | INFSYEVLTPLK                   |               | 99    |
|               |               | IQHHQPNLPPPAQQP                |               | 99    |
|               |               | LEAWPSTDKTKREEVD               |               | 99    |
|               |               | LHHQIIPVLS                     |               | 99    |
|               |               | LHHQIIPVLSQ                    |               | 99    |
|               |               | PLPPHPGHPGY                    |               | 99    |
|               |               | PLPPHPGHPGYIN                  |               | 99    |
|               |               | PLPPHPGHPGYINF                 |               | 99    |
|               |               | PLPPHPGHPGYINFS                |               | 99    |
|               |               | PLPPHPGHPGYINFSYE              |               | 99    |
|               |               | SYGYEPMGGW                     |               | 99    |
|               |               | WYQSIRPPYP                     |               | 99    |
|               |               | YQSIRPPYP                      |               | 99    |
|               |               | PPMLPDLT                       |               | 82.1  |

## Sequence coverage

MGTWILFACLLGAAFAM**PLPPHPGHPGYINF**SYEVLTPLKQYQSIRPPYPSYGYEP  
MGGW**LHHQIIPVLS**QQHPPTHTLQPHHHIPVVPAAQQPVIPQQPMMPVPGQHSMTPI  
QHHQPNLPPPAQQPYQPQVQPHQPMQPPVHPMQPLPPQPLPPHFMQPLP  
PML**PDLTLEAWPSTDKTKREEVD**

MGTWILFACLLGAAFAM**PLPPHPGHPGYINF**SYEVLTPLKQYQSIRPPYPSYGYEP  
MGGW**LHHQIIPVLS**QQHPPTHTLQPHHHIPVVPAAQQPVIPQQPMMPVPGQHSMTPI  
QHHQPNLPPPAQQPYQPQVQPHQPMQPPVHPMQPLPPQPLPPHFMQPLP  
PML**PDLTLEAWPSTDKTKREEVD**

MGTWILFACLLGAAFAM**PLPPHPGHPGYINF**SYEVLTPLKQYQSIRPPYPSYGYEP  
MGGW**LHHQIIPVLS**QQHPPTHTLQPHHHIPVVPAAQQPVIPQQPMMPVPGQHSMTPI  
**QHHQPNLPPPAQQP**YQPQVQPHQPMQPPVHPMQPLPPQPLPPHFMQPLP  
**PMLPDLTLEAWPSTDKTKREEVD**

Table S2. Amelogenin peptides identified from “Low Calcium and Low Phosphate” samples. All peptides identified with Conf.<99 have been manually verified by inspecting their MS/MS spectra. In sequence coverage pictures, the sequences in green are associated with high confident (Conf.=99) peptides identified, while those in yellow or red are associated with low confident peptides identified (not shown in table).





| Conditions               | Protein score | Amelogenin peptides identified | Modifications        | Conf. |
|--------------------------|---------------|--------------------------------|----------------------|-------|
| High phosphate<br>1 hour | 16            | DLTLEAWPSTDKTKREEVD            |                      | 99    |
|                          |               | LEAWPSTDKTKREEVD               |                      | 99    |
|                          |               | LHHQIIPVLS                     |                      | 99    |
|                          |               | LTLEAWPSTDKTKREEVD             |                      | 99    |
|                          |               | MLPDLTLEAWPSTDKTKREEVD         |                      | 99    |
|                          |               | PLPPHPGHPGY                    |                      | 99    |
|                          |               | PLPPHPGHPGYINF                 |                      | 99    |
|                          |               | PLPPHPGHPGYINFS                |                      | 99    |
| High phosphate<br>3 hour | 42.18         | DLTLEAWPSTDKTKREEVD            |                      | 99    |
|                          |               | INFSYEVLTPLK                   |                      | 99    |
|                          |               | LEAWPSTDKTKREEVD               |                      | 99    |
|                          |               | LHHQIIPVLS                     |                      | 99    |
|                          |               | LTLEAWPSTDKTKREEVD             |                      | 99    |
|                          |               | MQLPPLMLPDLTLEAWPSTDKTKREEVD   |                      | 99    |
|                          |               | PLPPHPGHPGY                    |                      | 99    |
|                          |               | PLPPHPGHPGYIN                  |                      | 99    |
|                          |               | PLPPHPGHPGYINF                 |                      | 99    |
|                          |               | PLPPHPGHPGYINFS                |                      | 99    |
|                          |               | PLPPHPGHPGYINFSYE              |                      | 99    |
|                          |               | PLPPHPGHPGYINFSYEVLTLP         |                      | 99    |
|                          |               | PLPPHPGHPGYINFSYEVLTPLK        |                      | 99    |
|                          |               | QSIRPPYPSYGYEPMGGW             | Gln->pyro-Glu@N-term | 99    |
|                          |               | SYGYEPMGGW                     |                      | 99    |
|                          |               | TLEAWPSTDKTKREEVD              |                      | 99    |
|                          |               | WYQSIRPPYP                     |                      | 99    |
|                          |               | YEVLTPLKWKY                    |                      | 99    |
|                          |               | YQSIRPPYP                      |                      | 99    |
|                          |               | YEVLTPLK                       |                      | 99    |
| QSIRPPYP                 |               | 83.5                           |                      |       |
| High phosphate<br>5 hour | 34.32         | DLTLEAWPSTDKTKREEVD            |                      | 99    |
|                          |               | INFSYEVLTPLK                   |                      | 99    |
|                          |               | LEAWPSTDKTKREEVD               |                      | 99    |
|                          |               | LHHQIIPVLS                     |                      | 99    |
|                          |               | PLPPHPGHPGY                    |                      | 99    |
|                          |               | PLPPHPGHPGYIN                  |                      | 99    |
|                          |               | PLPPHPGHPGYINF                 |                      | 99    |
|                          |               | PLPPHPGHPGYINFS                |                      | 99    |
|                          |               | PLPPHPGHPGYINFSYE              |                      | 99    |
|                          |               | PLPPHPGHPGYINFSYEVLTPLK        |                      | 99    |
|                          |               | QSIRPPYPSYGYEPMGGW             |                      | 99    |
|                          |               | VLTPKWKY                       |                      | 99    |
|                          |               | WYQSIRPPYP                     |                      | 99    |
|                          |               | YEVLTPLKWKY                    |                      | 99    |
|                          |               | YQSIRPPYP                      |                      | 99    |
| YQSIRPPYPSYGYEPMGGW      |               | 99                             |                      |       |
| YEVLTPLK                 |               | 99                             |                      |       |
| QSIRPPYP                 |               | 93                             |                      |       |

## Sequence coverage

MGTWILFACLLGAAAFAM**PLPPHPGHPGYINF**SYEVLTPLKWKYQSIRPPYPSYGYEP  
MGGW**LHHQIIPVLS**QQHPPTHTLQPHHHIPVVPAQQPVIPQQPMMPVPGQHSMTPI  
QHHQPNLPPPAQQPYQPQVQVQPHQPMQPPVHMQPLPPQPPLPPMFPMQPLP  
**PMLPDLTLEAWPSTDKTKREEVD**

MGTWILFACLLGAAAFAM**PLPPHPGHPGYINF**SYEVLTPLKWKYQSIRPPYPSYGYEP  
**MGGWLHHQIIPVLS**QQHPPTHTLQPHHHIPVVPAQQPVIPQQPMMPVPGQHSMTPI  
QHHQPNLPPPAQQPYQPQVQVQPHQPMQPPVHMQPLPPQPPLPPMFPMQPLP  
**PMLPDLTLEAWPSTDKTKREEVD**

MGTWILFACLLGAAAFAM**PLPPHPGHPGYINF**SYEVLTPLKWKYQSIRPPYPSYGYEP  
**MGGWLHHQIIPVLS**QQHPPTHTLQPHHHIPVVPAQQPVIPQQPMMPVPGQHSMTPI  
QHHQPNLPPPAQQPYQPQVQVQPHQPMQPPVHMQPLPPQPPLPPMFPMQPLP  
**PMLPDLTLEAWPSTDKTKREEVD**

Table S4. Amelogenin peptides identified from “High Phosphate” samples. All peptides identified with Conf.<99 have been manually verified by inspecting their MS/MS spectra. In sequence coverage pictures, the sequences in green are associated with high confident (Conf.=99) peptides identified, while those in yellow or red are associated with low confident peptides identified (not shown in table).

## Sequence coverage

| Conditions               | Protein score        | Amelogenin peptides identified  | Modifications  | Conf. |
|--------------------------|----------------------|---------------------------------|----------------|-------|
| Hig calcium              | 16                   | DLTLEAWPSTDKTKREEVD             |                | 99    |
| High phosphate<br>1 hour |                      | LEAWPSTDKTKREEVD                |                | 99    |
|                          |                      | LHHQIPVLS                       |                | 99    |
|                          |                      | LTLEAWPSTDKTKREEVD              |                | 99    |
|                          |                      | MLPDLTLEAWPSTDKTKREEVD          |                | 99    |
|                          |                      | PLPPHPGHPGY                     |                | 99    |
|                          |                      | PLPPHPGHPGYINF                  |                | 99    |
|                          | PLPPHPGHPGYINFS      |                                 | 99             |       |
| Hig calcium              | 56                   | AWPSTDKTKREEVD                  |                | 99    |
| High phosphate<br>3 hour |                      | DLTLEAWPSTDKTKREEV              |                | 99    |
|                          |                      | DLTLEAWPSTDKTKREEVD             | Oxidation(W)@7 | 99    |
|                          |                      | EAWPSTDKTKREEVD                 |                | 99    |
|                          |                      | INFSYEVLTPLK                    |                | 99    |
|                          |                      | LHHQIPVLS                       |                | 99    |
|                          |                      | LKWYQSIRPPYP                    |                | 99    |
|                          |                      | LTLEAWPSTDKTKREEVD              |                | 99    |
|                          |                      | MQPLPMLPDLTLEAWPSTDKTKREEVD     |                | 99    |
|                          |                      | PLPPHPGHPG                      |                | 99    |
|                          |                      | PLPPHPGHPGY                     |                | 99    |
|                          |                      | PLPPHPGHPGYIN                   |                | 99    |
|                          |                      | PLPPHPGHPGYINF                  |                | 99    |
|                          |                      | PLPPHPGHPGYINFS                 |                | 99    |
|                          |                      | PLPPHPGHPGYINFSYE               |                | 99    |
|                          |                      | PLPPHPGHPGYINFSYEVLTLP          |                | 99    |
|                          |                      | PLPPHPGHPGYINFSYEVLTPLK         |                | 99    |
|                          |                      | QSIRPPYPSYGYEPMGGW              |                | 99    |
|                          |                      | SYGYEPMGGW                      |                | 99    |
|                          |                      | TLEAWPSTDKTKREEVD               |                | 99    |
|                          |                      | WPSTDKTKREEVD                   |                | 99    |
|                          |                      | WYQSIRPPYP                      |                | 99    |
|                          |                      | WYQSIRPPYPSYGYEPMGGW            |                | 99    |
|                          |                      | YEVLTPLK                        |                | 99    |
|                          | YQSIRPPYP            |                                 | 99             |       |
|                          | YQSIRPPYPSYGYEPMGGW  |                                 | 99             |       |
| Hig calcium              | 55.28                | AWPSTDKTKREEVD                  |                | 99    |
| High phosphate<br>5 hour |                      | DLTLEAWPSTDKTKREEVD             | Oxidation(W)@7 | 99    |
|                          |                      | EAWPSTDKTKREEVD                 |                | 99    |
|                          |                      | INFSYEVLTPLK                    |                | 99    |
|                          |                      | LEAWPSTDKTKREEVD                | Oxidation(W)@4 | 99    |
|                          |                      | LHHQIPVLS                       |                | 99    |
|                          |                      | LHHQIPVLSQ                      |                | 99    |
|                          |                      | LKWYQSIRPPYP                    |                | 99    |
|                          |                      | LTLEAWPSTDKTKREEVD              |                | 99    |
|                          |                      | MLPDLTLEAWPSTDKTKREEVD          |                | 99    |
|                          |                      | MQPLPMLPDLTLEAWPSTDKTKREEVD     |                | 99    |
|                          |                      | PLPPHPGHPG                      |                | 99    |
|                          |                      | PLPPHPGHPGY                     |                | 99    |
|                          |                      | PLPPHPGHPGYIN                   |                | 99    |
|                          |                      | PLPPHPGHPGYINF                  |                | 99    |
|                          |                      | PLPPHPGHPGYINFS                 |                | 99    |
|                          |                      | PLPPHPGHPGYINFSYE               |                | 99    |
|                          |                      | PLPPHPGHPGYINFSYEVLTLP          |                | 99    |
|                          |                      | PLPPHPGHPGYINFSYEVLTPLK         |                | 99    |
|                          |                      | QQHPPTHHTLQPHHHIPVVPAAQQPVIPQQP |                | 99    |
|                          |                      | SYGYEPMGGW                      |                | 99    |
|                          |                      | TLEAWPSTDKTKREEVD               |                | 99    |
|                          |                      | VQPQHPQMPQPPVHP                 |                | 99    |
|                          |                      | WYQSIRPPYP                      |                | 99    |
|                          | WYQSIRPPYPSYGYEPMGGW |                                 | 99             |       |
|                          | YEVLTPLK             |                                 | 99             |       |
|                          | YQSIRPPYPSYGYEPMGGW  |                                 | 99             |       |
|                          | YQSIRPPYP            |                                 | 93.1           |       |

MGTWILFACLLGAAAFAM**PLPPHPGHPGYINFS**YEVLTPLKWKYQSIRPPYPSYGYEP  
 MGGW**LHHQIPVLS**QQHPPTHHTLQPHHHIPVVPAAQQPVIPQQPMMPVPGQHSMTPI  
 QHHQPNLPPAAQQPYQPQPVQPHQPMQPPVHPMQPLPQPPLPMPF**MQPLP**  
**PMLPDLTLEAWPSTDKTKREEVD**

MGTWILFACLLGAAAFAM**PLPPHPGHPGYINFS**YEVLTPLKWKYQSIRPPYPSYGYEP  
 MGGW**LHHQIPVLS**QQHPPTHHTLQPHHHIPVVPAAQQPVIPQQPMMPVPGQHSMTPI  
 QHHQPNLPPAAQQPYQPQPVQPHQPMQPPVHPMQPLPQPPLPMPF**MQPLP**  
**PMLPDLTLEAWPSTDKTKREEVD**

MGTWILFACLLGAAAFAM**PLPPHPGHPGYINFS**YEVLTPLKWKYQSIRPPYPSYGYEP  
 MGGW**LHHQIPVLS**QQHPPTHHTLQPHHHIPVVPAAQQPVIPQQP**MPVPGQHSMTPI**  
 QHHQPNLPPAAQQPYQPQPVQPHQPMQPPVHPMQPLPQPPLPMPF**MQPLP**  
**PMLPDLTLEAWPSTDKTKREEVD**

Table S5. Amelogenin peptides identified from “High Calcium and High Phosphate” samples. All peptides identified with Conf.<99 have been manually verified by inspecting their MS/MS spectra. In sequence coverage pictures, the sequences in green are associated with high confident (Conf.=99) peptides identified, while those in yellow or red are associated with low confident peptides identified (not shown in table).
